# Supplementary material
Source: PubMed Central journal article supplement (PMC3319859)
Supplement: NIHMS328535-supplement-01.pdf [file NIHMS328535-supplement-01.pdf]

## **Argus II Study Group Members**

Aries Ardit, Lighthouse International (New York, NY)

Rajat Agrawal, University of Southern California (Los Angeles, CA)

Pierre-Olivier Barale, Centre Hospitalier National d'Ophtalmologie des Quinze-Vingts (Paris, France)

David Birch, Retina Foundation of the Southwest (Dallas, TX)

Gary Brown, Wills Eye Hospital (Philadelphia, PA)

Artur V. Cideciyan, Scheie Eye Institute, University of Pennsylvania (Philadelphia, PA)

Lyndon da Cruz, Moorfields Eye Hospital; NIHR Biomedical Research Centre for Ophthalmology (London, UK)

Gislin Dagnelie, Lions Vision Research and Rehab Center, Johns Hopkins University (Baltimore MD)

Eugene de Juan, University of California, San Francisco (San Francisco, CA)

Lucian Del Priore, Columbia University (New York, NY)

Jacque L. Duncan, University of California, San Francisco (San Francisco, CA)

Dean Elliott, Doheny Eye Institute, University of Southern California (Los Angeles, CA)

Eugene Filley, Retina Foundation of the Southwest (Dallas, TX)

Julia Haller, Wills Eye Hospital (Philadelphia, PA)

James Handa, Wilmer Ophthalmological Institute, Johns Hopkins University (Baltimore, MD)

Allen Ho, Wills Eye Hospital (Philadelphia, PA)

Mark Humayun, Doheny Eye Institute, University of Southern California (Los Angeles, CA)

Samuel G. Jacobson, Scheie Eye Institute, University of Pennsylvania (Philadelphia, PA)

Saddek Mohand-Said, Centre Hospitalier National d'Ophtalmologie des Quinze-Vingts (Paris, France)

Marco Pelizzone, Hôpitaux Universitaires de Genève (Geneva, Switzerland)

Angelica Perez-Fornos, Hôpitaux Universitaires de Genève (Geneva, Switzerland)

Carl Regillo, Wills Eye Hospital (Philadelphia, PA)

Enrique Roig, Puerta de Hierro Centro Medico (Guadalajara, Mexico)

Avinoam B. Safran, Hôpitaux Universitaires de Genève (Geneva, Switzerland)

José-Alain Sahel, Centre Hospitalier National d'Ophtalmologie des Quinze-Vingts (Paris, France)

Joel Salzmann, Hôpitaux Universitaires de Genève (Geneva, Switzerland)

Arturo Santos, Centro de Retina Medica y Quirúrgica, SC, Escuela de Medicina, Tec de Monterrey

Campus Guadalajara (Guadalajara, Mexico)

Sarah Sheer, Centre Hospitalier National d'Ophtalmologie des Quinze-Vingts (Paris, France)

Jörg Sommerhalder, Hôpitaux Universitaires de Genève (Geneva, Switzerland)

Rand Spencer, Retina Foundation of the Southwest (Dallas, TX)

Paulo E. Stanga, Manchester Royal Eye Hospital; Manchester Biomedical Research Centre; University of Manchester (Manchester, UK)
